# Supplementary material for: COVID-19 and SARS-CoV-2 host cell entry mediators: Expression profiling of TMRSS4 in health and disease
Source: PubMed Central journal article supplement — Int J Mol Med. 2021 Feb 26;47(4):64. doi: 10.3892/ijmm.2021.4897 (PMC7914073; doi:10.3892/ijmm.2021.4897), 2021-02-26

Figure S1. (A) TMPRSS4 expression in LUAD and (B) LUSC in smokers vs. non-smokers. In LUAD, smokers vs. non-smokers group had lower expression ( $P=0.015$ ). In LUSC, there was a higher expression of TMPRSS4 in smokers compared to non-smokers ( $P=0.0005$ ); (C) TMPRSS4 expression was increased with age in UCEC with all groups compared to have significant increase in expression with age; (D) TMPRSS4 expression in female reproductive tissues.  $**P<0.01$ ,  $***P<0.001$ . LUAD, lung adenocarcinoma; LUSC, lung squamous cell carcinoma; UCEC, uterine corpus endometrial carcinoma.

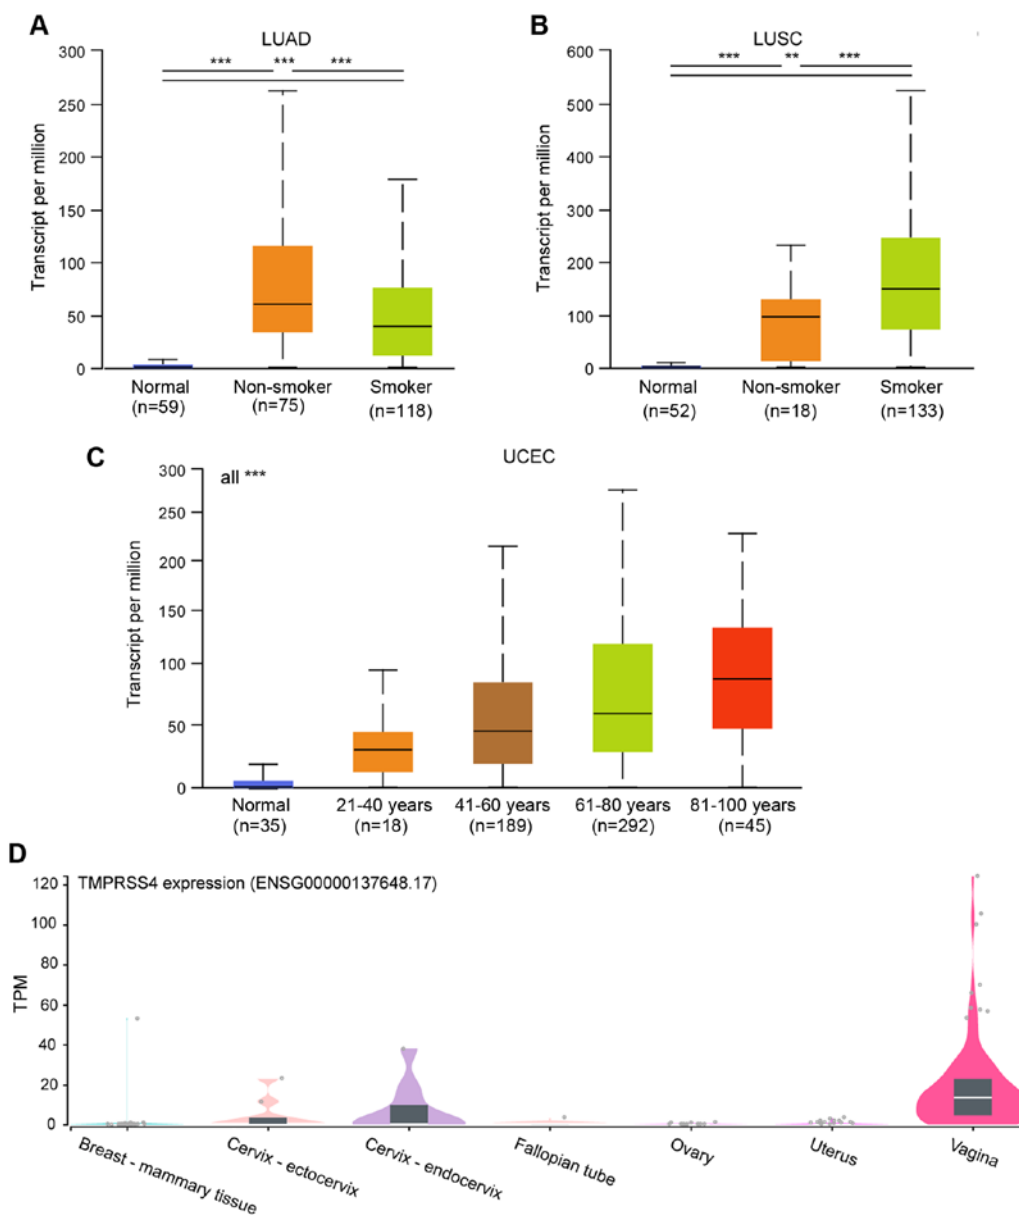

Supplement: Supplementary_Data.pdf [file Supplementary_Data.pdf]
